# Supplementary material for: Co-based MOF as an efficient catalyst by peroxymonosulfate activation for degradation of tetracycline: synthesis and performance
Source: Royal Society of Chemistry journal article supplement (doi:10.1039/d4ce00350k), 2024-01-01
Supplement: d4ce00350k1.pdf [file d4ce00350k1.pdf]

## Supporting Information

# Co-based MOF as an efficient catalyst by peroxymonosulfate activation for degradation of tetracycline: Synthesis and Performance

*Shu-Ran Zhang<sup>a</sup>, Shao-Dan Qin<sup>b</sup>, Guang-Juan Xu<sup>a</sup>, Wei Xie<sup>a</sup>, Na Xu<sup>a</sup>, Nan Jiang<sup>a</sup>, Yan-Hong  
Xu<sup>a\*</sup>, Xiao-Li Hu<sup>b\*</sup>, Zhong-Min Su<sup>b\*</sup>*

<sup>a</sup>Key Laboratory of Preparation and Applications of Environmental Friendly Materials (Jilin Normal University), Ministry of Education, Changchun 130103, Jilin, People's Republic of China

<sup>b</sup>School of Chemistry and Environmental Engineering, Changchun University of Science and Technology, Changchun, 130022, China.

\*Corresponding author: xuyh198@163.com (Yan-Hong Xu); huxiaoli1113@cust.edu.cn (Xiao-Li Hu); zmsu@nenu.edu.cn (Zhong-Min Su)

## Chemicals and materials

All chemical reagents and solvents were obtained from commercial sources and can be used directly without further purification.  $\text{Co}(\text{NO}_3)_2 \cdot 6\text{H}_2\text{O}$ , oxone® ( $\text{KHSO}_5 \cdot 0.5 \text{KHSO}_4 \cdot 0.5 \text{K}_2\text{SO}_4$ ,  $\text{KHSO}_5$  47%), Rhodamine B (RhB), Acid orange 7 (AO7), Methylene blue (MB), Malachite Green (MG), Eriochrome Black T (EBT), Methyl violet (MV), Congo Red (CR), tert-Butanol (TBA) were purchased from Shanghai Aladdin Biochemical Technology Co., LTD. 1,3,5-tris(4-carboxyphenyl)benzene (BTB), and 1,4-bis((1H-imidazol-1-yl)methyl)benzene (BIMB) were purchased from Jilin Chinese Academy of Sciences-Yanshen Technology Co., LTD. p-benzoquinone (p-BQ), L-Histidine (L-his) were purchased from Shanghai Maclin Biochemical Technology Co., LTD. Methanol (MeOH) was purchased from Tianjin Fuyu Fine Chemical Co., LTD. Ultrapure water was used for all experiments in this paper unless otherwise stated. The lake water was collected and filtered from South Lake Park in Changchun, China.

## Characterization

X-ray single crystal diffraction data of **JLNU-11** were collected using Bruker Smart Apex III Diffractometer equipped with a Mo target ( $K\alpha$ ,  $\lambda = 0.71073 \text{ \AA}$ ) at room temperature. The structure of **JLNU-11** was analyzed by the direct method and refined by the full matrix least-squares refinements utilizing the SHELXTL-97 program package. All non-hydrogen atoms underwent anisotropic refinement. The crystal structure information of **JLNU-11** was shown in Table S1. The CIF file for **JLNU-11** had been deposited in the Cambridge Crystallography Data Centre (CCDC), and CCDC number is 2270628. Elemental analyses (C, H and N) were obtained using a PerkinElmer 2400CHN auto analyzer. The PXRD of the samples was obtained through

the Rigaku D-Max 2550 instrument using Cu-K $\alpha$  radiation ( $\lambda = 1.5418 \text{ \AA}$ ). Thermogravimetric analysis (TGA) was implemented on DTG-60AH analyzer. The heating temperature range was from 38 to 800°C in nitrogen atmosphere, and the heating rate was 5 °C min<sup>-1</sup>. FT-IR spectra were analyzed in the range of 4000 - 400 cm<sup>-1</sup> on a Nicolet 380 FT-IR spectrophotometer through KBr pellets.

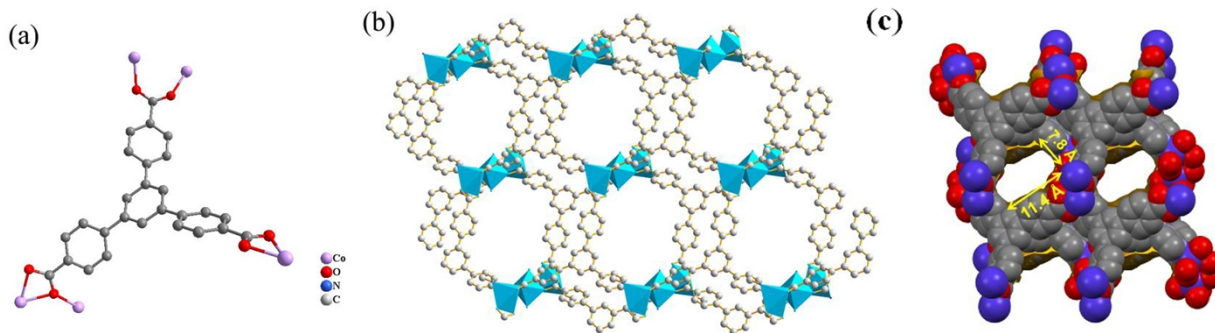

**Fig. S1.** (a) The coordination mode of BTB ligand. (b) The three-dimensional structure and (c) the pore stacking diagram of JLNU-11 along  $a$  axis

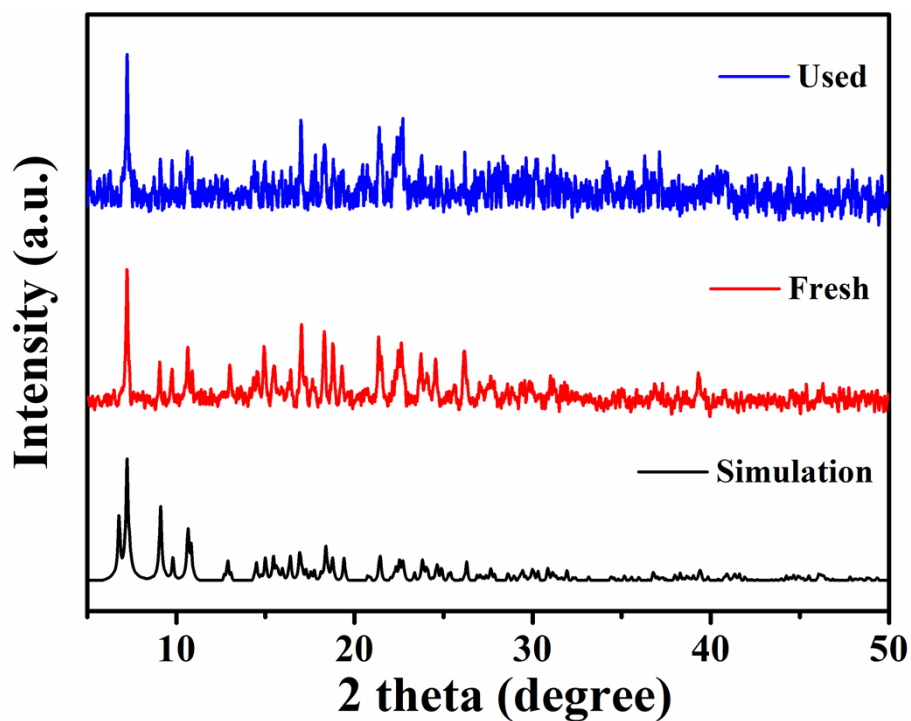

**Fig. S2.** Powder X-ray diffraction patterns of JLNU-11: simulation (black), experimental (red) and after reaction (blue).

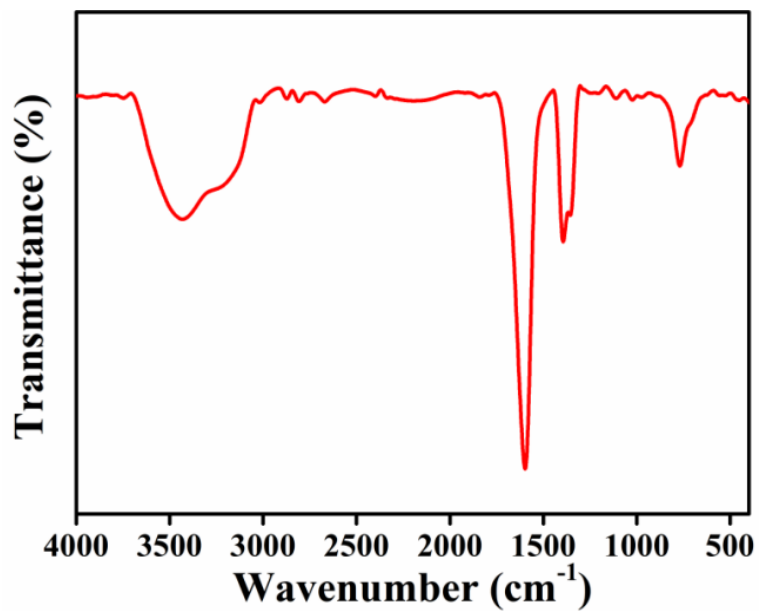

Fig. S3. FTIR spectra of JLNU-11.

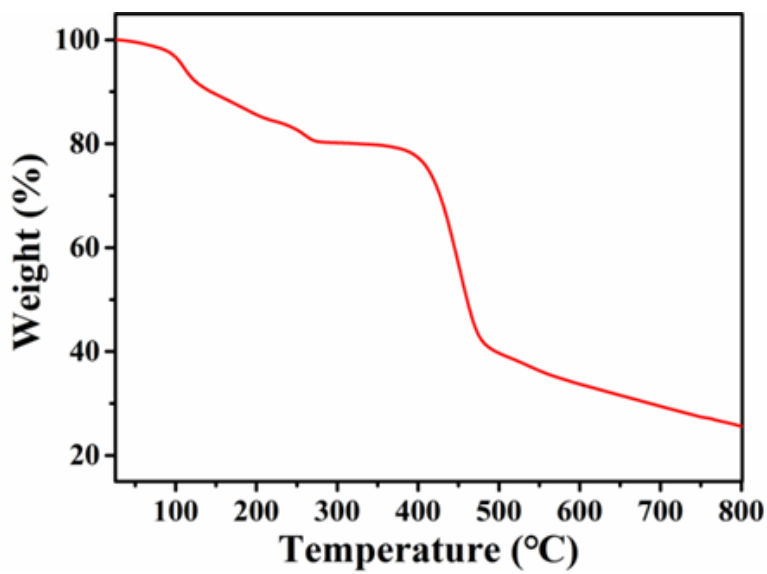

Fig. S4. TGA curve of JLNU-11.

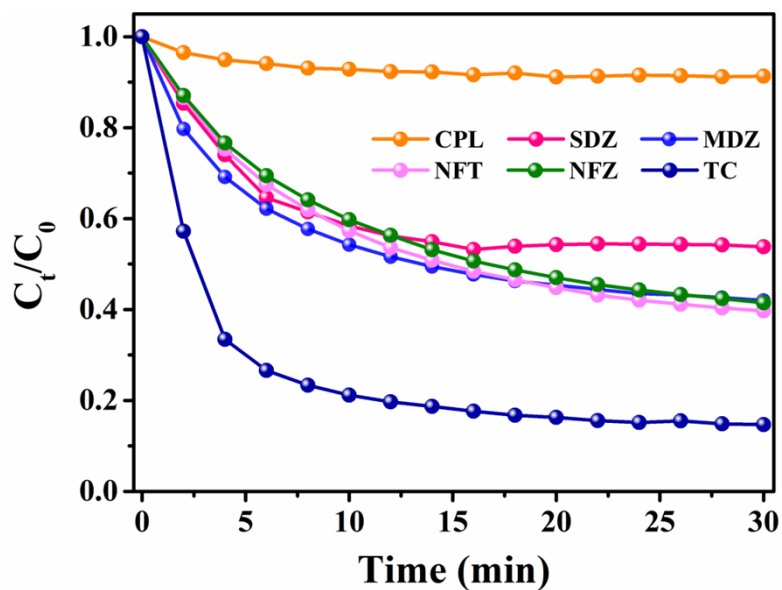

**Fig. S5.** Degradation curve of different antibiotics by JLNU-11/PMS system, experimental conditions: [JLNU 11] = 0.08 g/L, [PMS] = 0.12 g/L, [pollution] = 20 mg/L.

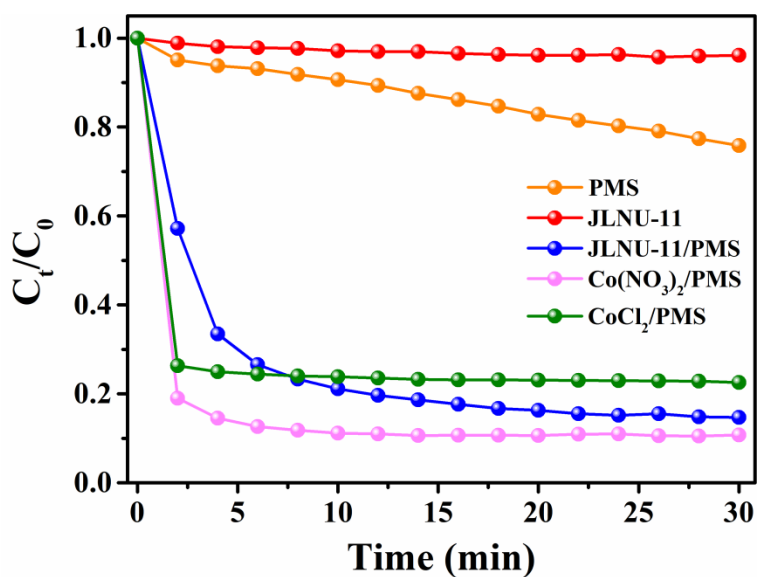

**Fig. S6.** Degradation curve of different catalysts, experimental conditions: [JLNU-11] = 0.08 g/L, [Co(NO<sub>3</sub>)<sub>2</sub> or Co(Cl)<sub>2</sub>] = 0.08 g/L, [PMS] = 0.12 g/L, [TC] = 20 mg/L

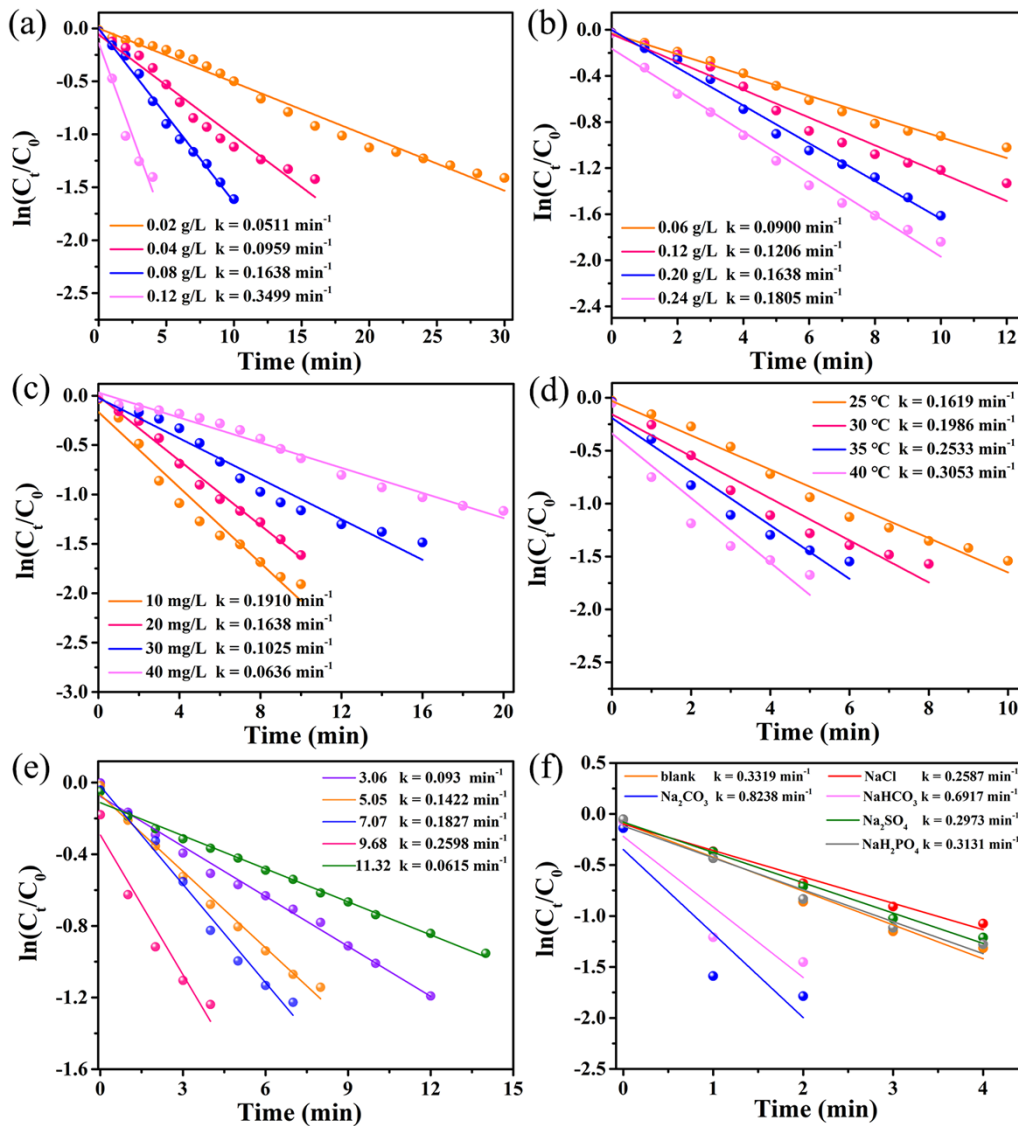

**Fig. S7.** Reaction rate constants: (a) JLNU-11 dose; (b) PMS concentration; (c) TC concentrations; (d) temperatures; (e) pH and (f) anions.

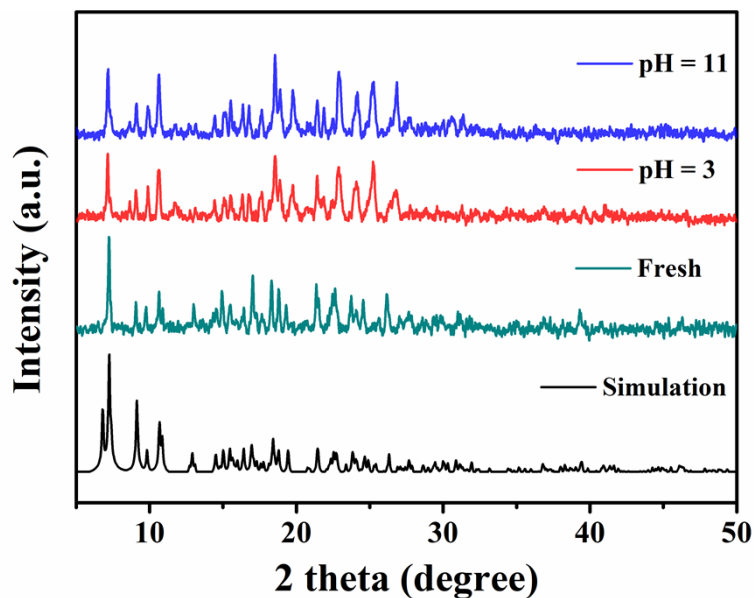

Fig. S8. Powder X-ray diffraction patterns of JLNU-11: simulation(black), . fresh (green), pH=3 (red) and pH=11(blue).

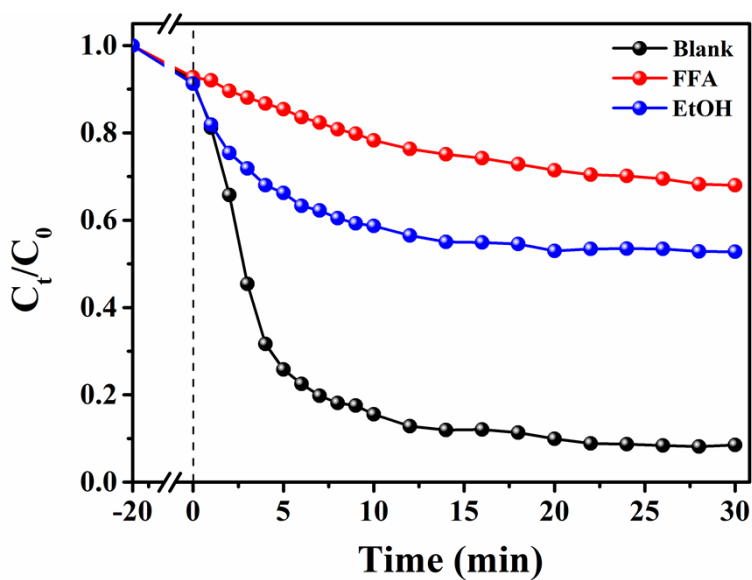

Fig. S9. Effects of different quenchers (EtOH and FFA) on TC degradation, experimental conditions: [JLNU-11] = 0.08 g/L, [PMS] = 0.20 g/L



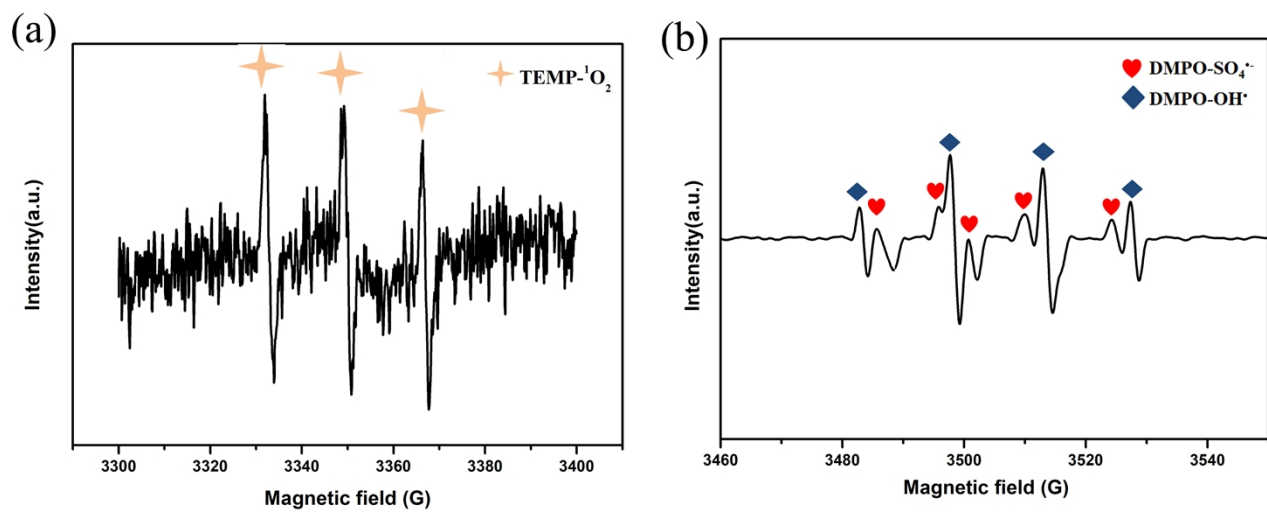

Fig. S10. The ESR signals of (a) TEMP-<sup>1</sup>O<sub>2</sub> and (b) DMPO- <sup>SO</sup><sub>4</sub>•<sup>-</sup>/•OH

**Table S1.** The detailed crystal parameters of **JLNU-11**

|                                                |                                                               |
|------------------------------------------------|---------------------------------------------------------------|
| Identification code                            | JLNU-11                                                       |
| CCDC Number                                    | 2270628                                                       |
| Empirical formula                              | $C_{68}H_{44}Co_3N_4O_{14}$                                   |
| Formula weight                                 | 1317.86                                                       |
| Temperature/K                                  | 296.15                                                        |
| Crystal system                                 | triclinic                                                     |
| Space group                                    | <i>P-1</i>                                                    |
| a/Å                                            | 12.174(3)                                                     |
| b/Å                                            | 11.1597(4)                                                    |
| c/Å                                            | 13.317(3)                                                     |
| $\alpha/^\circ$                                | 80.136(3)                                                     |
| $\beta/^\circ$                                 | 81.546(4)                                                     |
| $\gamma/^\circ$                                | 83.025(4)                                                     |
| Volume/Å <sup>3</sup>                          | 1958.6(8)                                                     |
| Z                                              | 1                                                             |
| $\rho_{\text{calc}}$ g/cm <sup>3</sup>         | 1.117                                                         |
| $\mu/\text{mm}^{-1}$                           | 0.683                                                         |
| F(000)                                         | 673.0                                                         |
| Radiation                                      | Mo K $\alpha$ ( $\lambda = 0.71073$ )                         |
| 2 $\theta$ range for data collection/ $^\circ$ | 3.334 to 51.594                                               |
| Index ranges                                   | $-14 \leq h \leq 13, -15 \leq k \leq 15, -16 \leq l \leq 12$  |
| Reflections collected                          | 11626                                                         |
| Independent reflections                        | 7475 [ $R_{\text{int}} = 0.0542, R_{\text{sigma}} = 0.1164$ ] |
| Data/restraints/parameters                     | 7475/0/403                                                    |
| Goodness-of-fit on $F^2$                       | 0.920                                                         |
| Final R indexes [ $I \geq 2\sigma(I)$ ]        | $R_1 = 0.0550, wR_2 = 0.1245$                                 |
| Final R indexes [all data]                     | $R_1 = 0.1115, wR_2 = 0.1488$                                 |
| Largest diff. peak/hole / e Å <sup>-3</sup>    | 0.59/-0.52                                                    |

**Table S2.** Selected bond distances (Å) for **JLNU-11**

| Atom | Atom            | Length/Å | Atom | Atom | Length/Å |
|------|-----------------|----------|------|------|----------|
| Co1  | O2 <sup>1</sup> | 2.223(3) | C5   | C22  | 1.381(6) |
| Co1  | O2 <sup>2</sup> | 2.223(3) | C5   | C29  | 1.395(6) |
| Co1  | O3 <sup>3</sup> | 2.011(3) | C6   | C7   | 1.403(5) |
| Co1  | O3              | 2.011(3) | C6   | C24  | 1.385(6) |
| Co1  | O4              | 2.120(3) | C7   | C10  | 1.388(5) |
| Co1  | O4 <sup>3</sup> | 2.120(3) | C8   | C11  | 1.378(5) |
| Co2  | O1              | 2.022(3) | C8   | C12  | 1.394(5) |
| Co2  | O2 <sup>2</sup> | 2.092(3) | C9   | C17  | 1.407(5) |
| Co2  | O5 <sup>2</sup> | 2.296(3) | C10  | C16  | 1.381(6) |
| Co2  | O6 <sup>4</sup> | 2.026(3) | C11  | C19  | 1.487(5) |
| Co2  | N1              | 2.066(4) | C11  | C21  | 1.395(6) |
| O1   | C2              | 1.270(5) | C12  | C14  | 1.396(5) |
| O2   | C19             | 1.300(5) | C13  | C17  | 1.405(5) |
| O3   | C2              | 1.256(5) | C14  | C27  | 1.397(6) |
| O5   | C19             | 1.261(5) | C15  | C16  | 1.396(6) |
| O6   | C25             | 1.259(6) | C15  | C24  | 1.392(6) |
| N1   | C23             | 1.317(5) | C16  | C17  | 1.492(5) |
| N1   | C26             | 1.381(6) | C18  | C20  | 1.370(6) |
| O7   | C25             | 1.252(5) | C18  | C22  | 1.397(5) |
| N2   | C23             | 1.335(6) | C20  | C25  | 1.499(6) |
| N2   | C31             | 1.352(6) | C20  | C28  | 1.383(6) |

|    |     |          |     |                  |          |
|----|-----|----------|-----|------------------|----------|
| N2 | C32 | 1.484(6) | C21 | C27              | 1.375(6) |
| C1 | C3  | 1.388(5) | C26 | C31              | 1.346(7) |
| C1 | C13 | 1.378(5) | C28 | C29              | 1.381(6) |
| C1 | C14 | 1.489(5) | C30 | C32              | 1.529(7) |
| C2 | C6  | 1.497(6) | C30 | C33              | 1.360(7) |
| C3 | C4  | 1.392(5) | C30 | C34              | 1.357(7) |
| C4 | C5  | 1.487(5) | C33 | C34 <sup>5</sup> | 1.378(7) |
| C4 | C9  | 1.388(5) |     |                  |          |

<sup>1</sup>1-X,2-Y,1-Z; <sup>2</sup>-1+X,+Y,1+Z; <sup>3</sup>-X,2-Y,2-Z; <sup>4</sup>-1+X,1+Y,+Z; <sup>5</sup>-X,1-Y,1-Z

**Table S3.** Selected bond angles (°) for **JLNU-11**.

| Atom            | Atom | Atom            | Angles (°) | Atom | Atom | Atom | Angles (°) |
|-----------------|------|-----------------|------------|------|------|------|------------|
| O2 <sup>1</sup> | Co1  | O2 <sup>2</sup> | 180.0      | C22  | C5   | C29  | 117.4(4)   |
| O3              | Co1  | O2 <sup>2</sup> | 93.56(11)  | C29  | C5   | C4   | 122.1(4)   |
| O3 <sup>3</sup> | Co1  | O2 <sup>1</sup> | 93.56(11)  | C7   | C6   | C2   | 121.5(4)   |
| O3 <sup>3</sup> | Co1  | O2 <sup>2</sup> | 86.44(11)  | C24  | C6   | C2   | 119.6(4)   |
| O3              | Co1  | O2 <sup>1</sup> | 86.44(11)  | C24  | C6   | C7   | 118.7(4)   |
| O3 <sup>3</sup> | Co1  | O3              | 180.0      | C10  | C7   | C6   | 120.3(4)   |
| O3              | Co1  | O4              | 94.49(12)  | C11  | C8   | C12  | 120.5(4)   |
| O3 <sup>3</sup> | Co1  | O4              | 85.51(12)  | C4   | C9   | C17  | 121.7(4)   |
| O3 <sup>3</sup> | Co1  | O4 <sup>3</sup> | 94.49(12)  | C16  | C10  | C7   | 120.9(4)   |
| O3              | Co1  | O4 <sup>3</sup> | 85.51(12)  | C8   | C11  | C19  | 120.5(4)   |
| O4 <sup>3</sup> | Co1  | O2 <sup>2</sup> | 89.46(11)  | C8   | C11  | C21  | 119.1(4)   |
| O4 <sup>3</sup> | Co1  | O2 <sup>1</sup> | 90.54(11)  | C21  | C11  | C19  | 120.3(4)   |
| O4              | Co1  | O2 <sup>2</sup> | 90.54(11)  | C8   | C12  | C14  | 120.8(4)   |

|                  |     |                  |            |     |     |     |          |
|------------------|-----|------------------|------------|-----|-----|-----|----------|
| O4               | Co1 | O2 <sup>1</sup>  | 89.46(11)  | C1  | C13 | C17 | 121.6(4) |
| O4 <sup>3</sup>  | Co1 | O4               | 180.00(16) | C12 | C14 | C1  | 120.3(4) |
| O1               | Co2 | O2 <sup>1</sup>  | 100.28(12) | C12 | C14 | C27 | 117.7(4) |
| O1               | Co2 | O5 <sup>1</sup>  | 160.31(11) | C27 | C14 | C1  | 121.9(4) |
| O1               | Co2 | O6 <sup>4</sup>  | 99.98(13)  | C24 | C15 | C16 | 120.7(4) |
| O1               | Co2 | N1               | 94.04(14)  | C10 | C16 | C15 | 118.5(4) |
| O2 <sup>1</sup>  | Co2 | O5 <sup>1</sup>  | 60.04(11)  | C10 | C16 | C17 | 120.7(4) |
| O6 <sup>4</sup>  | Co2 | O2 <sup>1</sup>  | 143.94(14) | C15 | C16 | C17 | 120.6(4) |
| O6 <sup>4</sup>  | Co2 | O5 <sup>1</sup>  | 97.46(13)  | C9  | C17 | C16 | 119.7(4) |
| O6 <sup>4</sup>  | Co2 | N1               | 97.33(15)  | C13 | C17 | C9  | 117.5(4) |
| N1               | Co2 | O2 <sup>1</sup>  | 110.61(13) | C13 | C17 | C16 | 122.6(4) |
| N1               | Co2 | O5 <sup>1</sup>  | 92.73(14)  | C20 | C18 | C22 | 120.1(4) |
| C2               | O1  | Co2              | 126.2(3)   | O2  | C19 | C11 | 120.0(4) |
| Co2 <sup>5</sup> | O2  | Co1 <sup>5</sup> | 117.22(13) | O5  | C19 | O2  | 118.6(4) |
| C19              | O2  | Co1 <sup>5</sup> | 139.8(3)   | O5  | C19 | C11 | 121.4(4) |
| C19              | O2  | Co2 <sup>5</sup> | 94.8(2)    | C18 | C20 | C25 | 120.0(4) |
| C2               | O3  | Co1              | 141.8(3)   | C18 | C20 | C28 | 119.0(4) |
| C19              | O5  | Co2 <sup>5</sup> | 86.6(3)    | C28 | C20 | C25 | 120.9(4) |
| C25              | O6  | Co2 <sup>6</sup> | 100.6(3)   | C27 | C21 | C11 | 120.3(4) |
| C23              | N1  | Co2              | 126.0(3)   | C5  | C22 | C18 | 121.6(4) |
| C23              | N1  | C26              | 104.0(4)   | N1  | C23 | N2  | 112.2(4) |
| C26              | N1  | Co2              | 127.6(3)   | C6  | C24 | C15 | 120.5(4) |
| C23              | N2  | C31              | 107.2(4)   | O6  | C25 | C20 | 119.2(4) |
| C23              | N2  | C32              | 126.5(4)   | O7  | C25 | O6  | 119.9(4) |
| C31              | N2  | C32              | 126.0(4)   | O7  | C25 | C20 | 120.9(5) |
| C3               | C1  | C14              | 120.1(4)   | C31 | C26 | N1  | 110.1(5) |
| C13              | C1  | C3               | 119.2(4)   | C21 | C27 | C14 | 121.4(4) |

|     |    |     |          |     |     |                  |          |
|-----|----|-----|----------|-----|-----|------------------|----------|
| C13 | C1 | C14 | 120.6(4) | C29 | C28 | C20              | 120.8(4) |
| O1  | C2 | C6  | 117.9(4) | C28 | C29 | C5               | 121.0(4) |
| O3  | C2 | O1  | 125.5(4) | C33 | C30 | C32              | 119.1(5) |
| O3  | C2 | C6  | 116.4(4) | C34 | C30 | C32              | 123.7(5) |
| C1  | C3 | C4  | 121.5(4) | C34 | C30 | C33              | 117.2(5) |
| C3  | C4 | C5  | 121.3(4) | C26 | C31 | N2               | 106.4(5) |
| C9  | C4 | C3  | 118.4(3) | N2  | C32 | C30              | 112.9(4) |
| C9  | C4 | C5  | 120.2(4) | C30 | C33 | C34 <sup>7</sup> | 121.5(5) |
| C22 | C5 | C4  | 120.4(4) | C30 | C34 | C33 <sup>7</sup> | 121.3(5) |

---

<sup>1</sup>-1+X,+Y,1+Z; <sup>2</sup>1-X,2-Y,1-Z; <sup>3</sup>-X,2-Y,2-Z; <sup>4</sup>-1+X,1+Y,+Z; <sup>5</sup>1+X,+Y,-1+Z; <sup>6</sup>1+X,-1+Y,+Z; <sup>7</sup>-

X,1-Y,1-Z
